# Supplementary material for: The Impact of Hydroxychloroquine on Primary Feto-Placental Endothelial Cells from Healthy and Early-Onset Preeclamptic Placentas
Source: MDPI journal article supplement (doi:10.3390/ijms241310934), 2023-06-30
Supplement: s1 [file s1]

## Supplementary Materials

### A.I

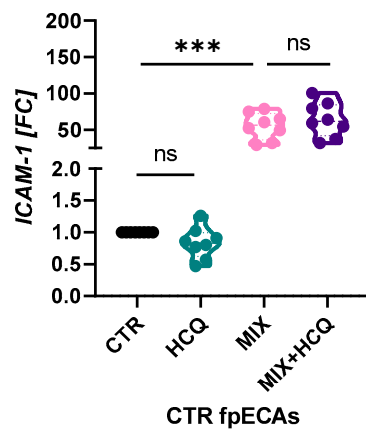

### A.II

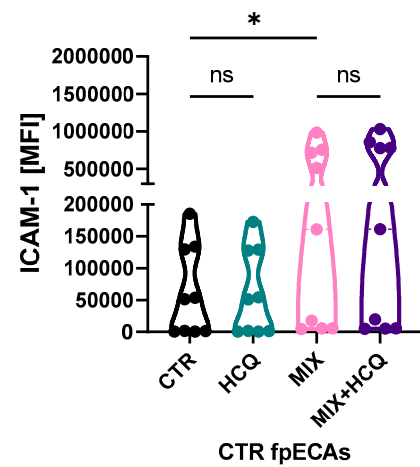

### B.I

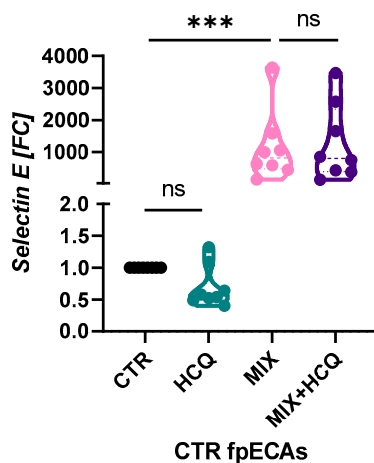

### B.II

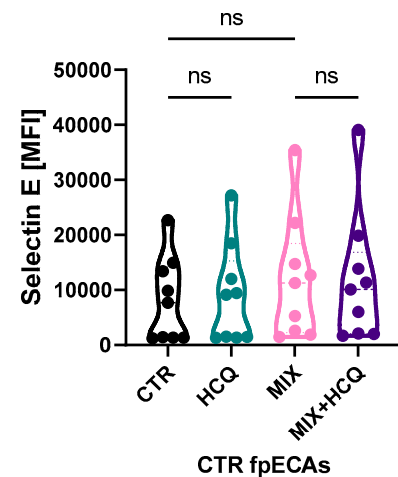

**Figure S1** HCQ effect on basal and cytokine induced levels of ICAM-1 (**A**) and SELE (**B**). In case of ICAM-1 MIX significantly increased both mRNA (**A.I**) and membrane presence (**A.II**); *SELE* transcription (**B.I**) was affected only by MIX. Although, increasing trend was present on protein level of SELE (**B.II**), it was not significant. HCQ did not have any effect either alone or in combination with MIX on any level of ICAM-1 or SELE. N = 8 – 9. Repeated measurements (RM) one-way ANOVA with Sidak's post-hoc test was used to determine the significance. \*\*\*  $p \leq 0.001$ , ns= not significant. CTR, control; HCQ, hydroxychloroquine, MIX, cytokine mix; fpECA, feto-placental endothelial cells isolated from arteries; ICAM-1, intercellular adhesion molecule 1; SELE, selectin E.

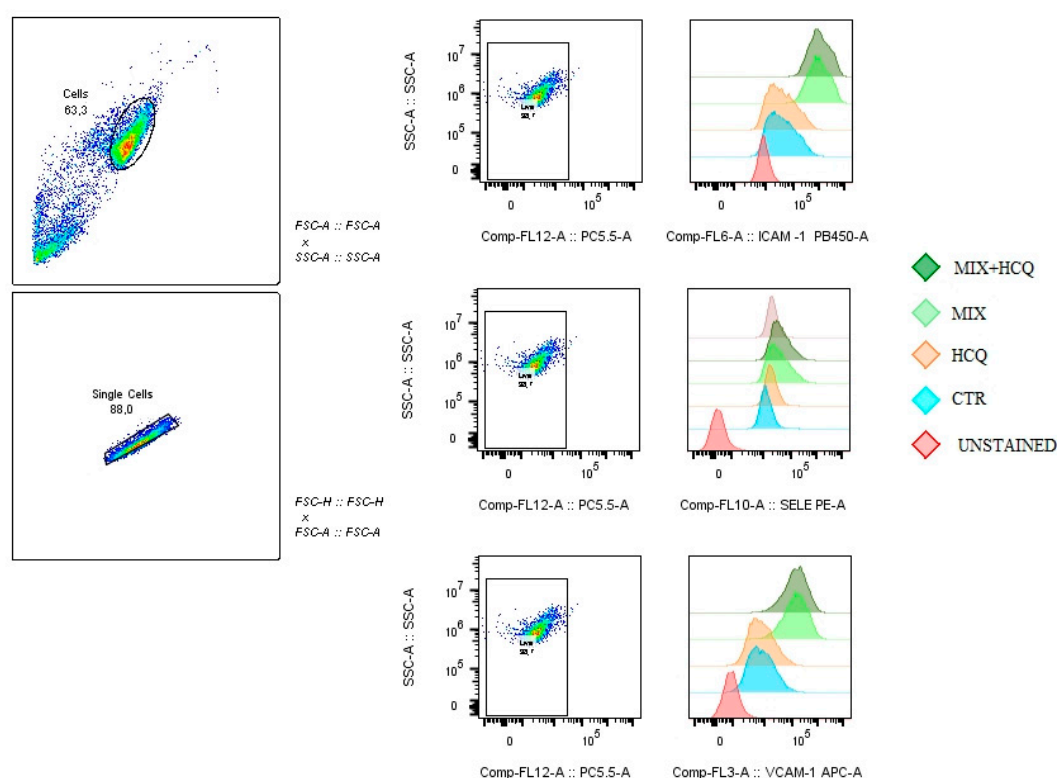

**Figure S2** Gating strategy - The cells were initially segregated based on their size using area forward and side scatter measurements (FSC-A and SSC-A). Then, doublet discrimination was carried out by plotting the height of FSC (FCS-H) against the area of FSC (FCS-A). To account for surface protein expression, an additional gating step was applied to separate 7-AAD positive and negative cells, and only the 7-AAD negative population was considered. Finally, ICAM-1, VCAM-1 and SELE positive and negative cell populations were represented in a histogram in each condition with unstained control. VCAM-1, vascular cell adhesion protein 1; SELE, Selectin E.

**Table S1** List of primer assays used for the RT-qPCR analysis

| Target           | Assay                                                                      | Supplier       |
|------------------|----------------------------------------------------------------------------|----------------|
| 18S              | Forward (5'-3') CTACCACATCCAAGGAAGCA<br>Reverse (5'-3') TTTTTCGTCACCTCCCCG | Sigma- Aldrich |
| RPL30            | Hs_RPL30_1_SG QuantiTect Primer Assay (QT00056651)                         | Quiagen        |
| HPRT1            | Hs_HPRT1_1_SG QuantiTect Primer Assay (QT00059066)                         | Quiagen        |
| IL-6 R1          | Hs_IL6R_1_SG QuantiTect Primer Assay (QT00023660)                          | Quiagen        |
| TNF- $\alpha$ R1 | Hs_TNFRSF1A_1_SG QuantiTect Primer Assay (QT00216993)                      | Quiagen        |
| IL-1 $\beta$ R1  | Hs_IL1R1_1_SG QuantiTect Primer Assay (QT00081263)                         | Quiagen        |
| CXCL8            | Hs_CXCL8_1_SG QuantiTect Primer Assay (QT00000322)                         | Quiagen        |
| ICAM-1           | Hs_ICAM1_1_SG QuantiTect Primer Assay (QT00074900)                         | Quiagen        |
| VCAM-1           | Hs_VCAM1_1_SG QuantiTect Primer Assay (QT00018347)                         | Quiagen        |
| SELE             | Hs_SELE_1_SG QuantiTect Primer Assay (QT00015358).                         | Quiagen        |

RPL30, Ribosomal Protein L30; 18S, 18 Ribosomal RNA; HPRT1, Hypoxanthine phosphoribosyl transferase 1, HPRT1; IL-6 R1, Interleukin 6 receptor; IL-1 $\beta$  R1, Interleukin 1 $\beta$  receptor 1; TNF- $\alpha$  R1, Tumor Necrosis Factor  $\alpha$  receptor 1; CXCL8, Interleukin 8.
